# Supplementary material for: Flexible thermoelectric CMTs/KCl/gelatin composite for a wearable pressure and temperature sensor
Source: Royal Society of Chemistry journal article supplement (doi:10.1039/d3ra08471j), 2024-01-01
Supplement: d3ra08471j1.pdf [file d3ra08471j1.pdf]

## Supporting Information

### Flexible thermoelectric CMTs/KCl gelatin composite for wearable pressure and temperature sensor

*Hongjie Wang,<sup>1</sup> Jilun Guan,<sup>1</sup> Mei He,<sup>1,\*</sup> Yanqiu Zhu,<sup>3,\*</sup> Fangchao Cheng<sup>1,2,\*</sup>*

<sup>1</sup> State Key Laboratory of Featured Metal Materials and Life-cycle Safety for Composite Structures, School of Resources, Environment and Materials, Guangxi University, Nanning 530004, China

<sup>2</sup> College of Material Science and Engineering, Central South University of Forestry and Technology, Changsha 410004, China

<sup>3</sup> College of Engineering, Mathematics and Physical Sciences, University of Exeter, Exeter EX4 4QF, UK

\* Corresponding Authors:

meihe@gxu.edu.com (M.H.)

Y.Zhu@exeter.ac.uk (Y.Z.)

fangchaocheng@gxu.edu.cn (F.C.)

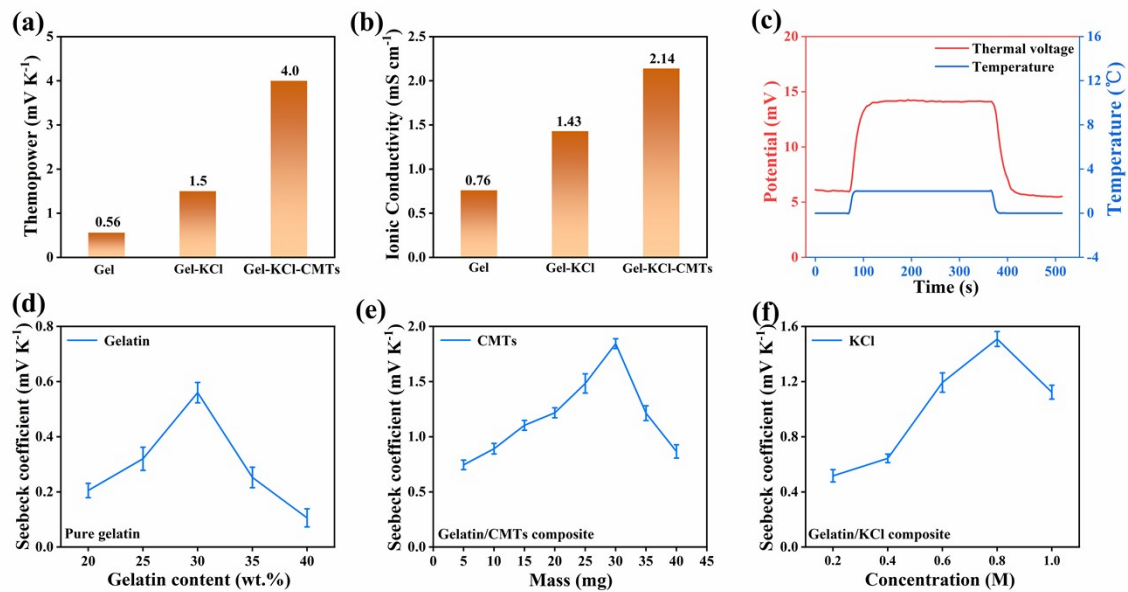

**Fig. S1.** (a) Seebeck coefficient of gels with different components. (b) Conductivity of gels with different components. (c) Thermal voltage of ionic gel. (d) Seebeck coefficient of pure gelatin sample with different mass fraction of gelatin. (e) Seebeck coefficient of gelatin/CMTs sample with different additions of CMTs. (f) Seebeck coefficient of gelatin/KCl sample with different KCl concentrations.

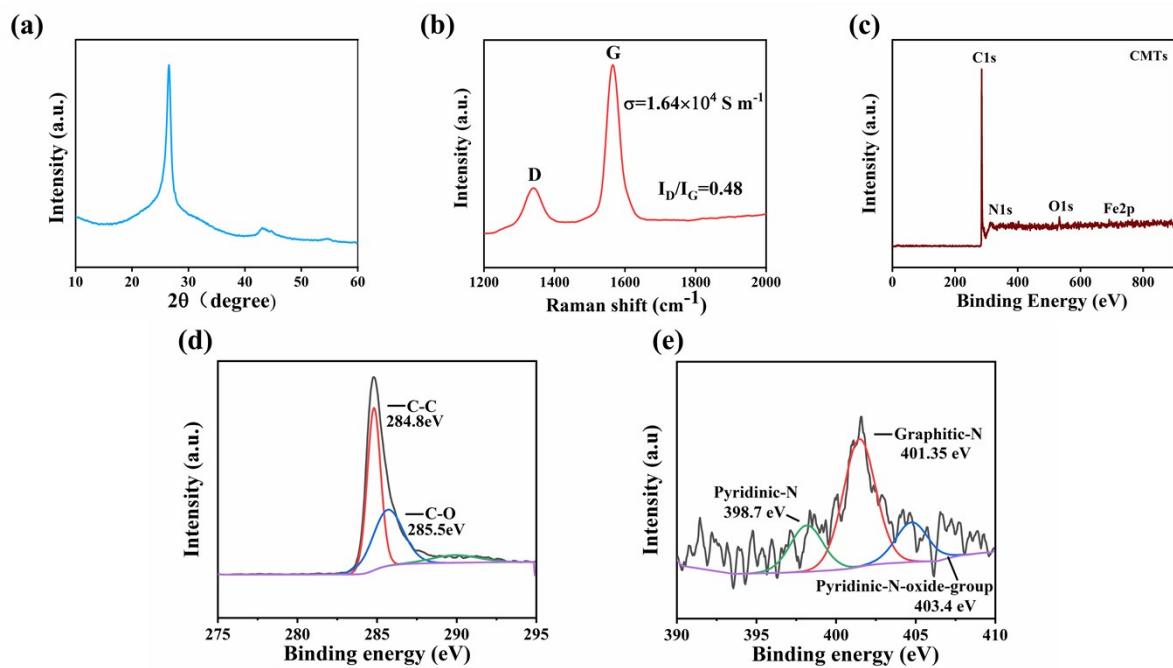

**Fig. S2.** (a) XRD patterns of CMTs. (b) Raman spectra and conductivity of CMTs. (c) XPS survey spectra and (d) C 1s, (e) N 1s spectra of CMTs.

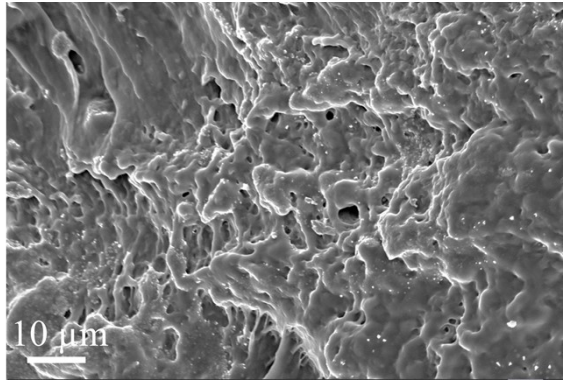

**Fig. S3.** SEM images of the KCl/gelatin composite.

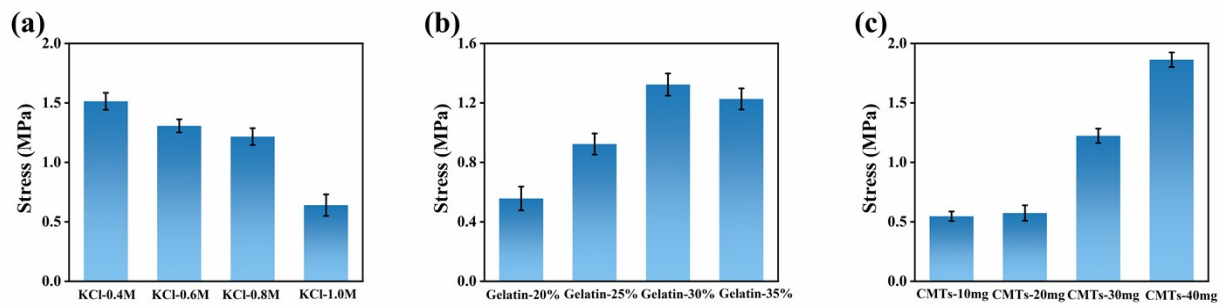

**Fig. S4.** Mechanical properties of the CMTs/KCl/gelatin composite with (a) different KCl concentrations. (b) different mass fraction of gelatin and (c) different additions of CMTs.

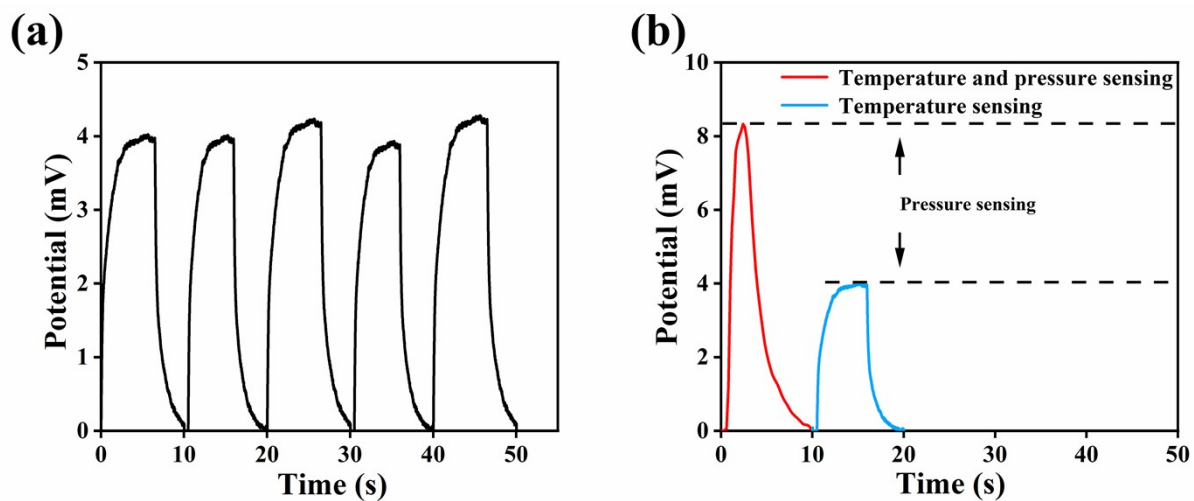

**Fig. S5.** (a) Voltage response of the sensor at a temperature difference of 1 K. (b) The effect of pressure on the potential change of the sensor.

**Table S1.** The comparison of Seebeck coefficients of the CMTs/KCl/gelatin with other materials

| Material            | Ion donors                               | Seebeck(mV/K) | Ref |
|---------------------|------------------------------------------|---------------|-----|
| Gelatin             | [EMIM]DCA                                | 2.8           | 1   |
| PVA                 | Fe <sup>2+</sup> /Fe <sup>3+</sup>       | 1.02          | 2   |
| Cellulose           | [Co(bpy) <sub>3</sub> ] <sup>2+/3+</sup> | 1.15          | 3   |
| PEDOT:PSS           | Ag <sup>+</sup>                          | 0.1           | 4   |
| PMMA/SWCNT          | Sn <sup>2+</sup> /Sn <sup>4+</sup>       | 1.1           | 5   |
| PEGDMA              | BMIM:BF <sub>4</sub>                     | 2.35          | 6   |
| PVDF-HFP            | Co(bpy) <sub>3</sub> <sup>2+/3+</sup>    | 1.84          | 7   |
| Sodium polyacrylate | Fe <sup>2+</sup> /Fe <sup>3+</sup>       | -1.09         | 8   |

**Table S2.** The comparison of the CMTs/KCl/Gel sensor in this study with other materials

| Material                                                                 | Sensor type    | Pressure sensing | Temperature sensing | Flexibility | Cost | Environmental impact | Ref       |
|--------------------------------------------------------------------------|----------------|------------------|---------------------|-------------|------|----------------------|-----------|
| The CMTs/KCl/Gel composite                                               | Dual-mode      | Able             | Able                | Good        | Low  | Low                  | This work |
| Carbon nanotubes and Ti <sub>3</sub> C <sub>2</sub> T <sub>x</sub> MXene | Piezoresistive | Able             | Unable              | Good        | High | Low                  | 9         |
| Porous polyurethane and Graphene                                         | Piezoresistive | Able             | Unable              | Good        | High | Low                  | 10        |
| PEDOT/PSS/CNF                                                            | Piezoresistive | Unable           | Able                | Good        | High | Low                  | 11        |
| Polyethyleneimine/reduced graphene oxide                                 | Piezoresistive | Unable           | Able                | Good        | High | High                 | 12        |
| Polydimethylsiloxane                                                     | Capacitive     | Unable           | Able                | Bad         | Low  | High                 | 13        |
| MWCNT/PDMS                                                               | Capacitive     | Able             | Unable              | Good        | High | High                 | 14        |

## References

1. T. J. Abraham, D. R. MacFarlane and J. M. Pringle, *Energ Environ Sci*, 2013, **6**, 2639-2645.
2. P. Yang, K. Liu, Q. Chen, X. Mo, Y. Zhou, S. Li, G. Feng and J. Zhou, *Angew Chem Int Ed Engl*, 2016, **55**, 12050-12053.
3. A. Taheri, D. R. MacFarlane, C. Pozo-Gonzalo and Jennifer M. Pringle, *Sustain Energ Fuels*, 2018, **2**, 1806-1812.
4. W. B. Chang, H. Fang, J. Liu, C. M. Evans, B. Russ, B. C. Popere, S. N. Patel, M. L. Chabinyk and R. A. Segalman, *ACS Macro Lett*, 2016, **5**, 455-459.
5. G. Wu, Y. Xue, L. Wang, X. Wang and G. Chen, *J Mater Chem A*, 2018, **6**, 3376-3380.
6. I. H. Sajid, N. Aslfattahi, M. F. Mohd Sabri, S. M. Said, R. Saidur, M. F. Mohd Salleh, N. N. Nik Ghazali and S. W. Hasan, *Electrochim Acta*, 2019, **320**, 134575-134585.
7. A. Taheri, D. R. MacFarlane, C. Pozo-Gonzalo and J. M. Pringle, *ChemSusChem*, 2018, **11**, 2788-2796.
8. J. Wu, J. J. Black and L. Aldous, *Electrochim Acta*, 2017, **225**, 482-492.
9. H. Wang, R. Zhou, D. Li, L. Zhang, G. Ren, L. Wang, J. Liu, D. Wang, Z. Tang, G. Lu, G. Sun, H. D. Yu and W. Huang, *ACS Nano*, 2021, **15**, 9690-9700.
10. H. Cho, H. Lee, S. Lee and S. Kim, *Ceram Int*, 2021, **47**, 17702-17710.



11. J. Zhou and Y. L. Hsieh, *ACS Appl Mater Interfaces*, 2018, **10**, 27902-27910.
12. Q. Liu, H. Tai, Z. Yuan, Y. Zhou, Y. Su and Y. Jiang, *Adv Mater Technol-Us*, 2019, **4**, 1800594-1800603.
13. J. Li, L. Gai, H. Li and H. Hu, *Sensor Actuat A-Phys*, 2017, **263**, 369-372.
14. H. Jang, H. Yoon, Y. Ko, J. Choi, S. S. Lee, I. Jeon, J. H. Kim and H. Kim, *Nanoscale*, 2016, **8**, 5667-5675.
